# Supplementary material for: Efficient coupling of a hierarchical V2O5@Ni3S2hybrid nanoarray for pseudocapacitors and hydrogen production
Source: Royal Society of Chemistry journal article supplement (doi:10.1039/c7ta04755j), 2017-01-01
Supplement: c7ta04755j1.pdf [file c7ta04755j1.pdf]

## Supporting Information

### **Efficient Coupling of Hierarchical V<sub>2</sub>O<sub>5</sub>@Ni<sub>3</sub>S<sub>2</sub> Hybrid Nanoarray for Pseudocapacitors and Hydrogen Production**

*Xiongwei Zhong<sup>+, a, b</sup>, Linfei Zhang<sup>+, b</sup>, Jun Tang<sup>b</sup>, Jianwei Chai<sup>c</sup>, Jincheng Xu<sup>a</sup>, Lujie Cao<sup>a, b</sup>,  
Mingyang Yang<sup>a, b</sup>, Ming Yang<sup>c</sup>, Weiguang Kong<sup>b</sup>, Shijie Wang<sup>c</sup>, Hua Cheng<sup>b</sup>, Zhouguang Lu<sup>b</sup>, Chun  
Cheng<sup>\*, b</sup>, Baomin Xu<sup>\*, b</sup>, and Hui Pan<sup>\*, a</sup>*

*<sup>a</sup> Institute of Applied Physics and Materials Engineering, University of Macau, Macao SAR, China*

*<sup>b</sup> Department of Materials Science and Engineering, Southern University of Science and Technology, Shenzhen, Guangdong Province, 518055, China*

*<sup>c</sup> Institute of Materials Research and Engineering (IMRE), A\*STAR (Agency for Science, Technology, and Research), #08-03, 2 Fusionopolis Way, Innovis, Singapore 138634.*

*\* Corresponding authors. Tel.: +853 88224427;*

*E-mail address: chengc@sustc.edu.cn (Chun Cheng); xubm@sustc.edu.cn (Baomin Xu); huipan@umac.mo (Hui Pan)*

*+ These authors contributed equally to this work.*

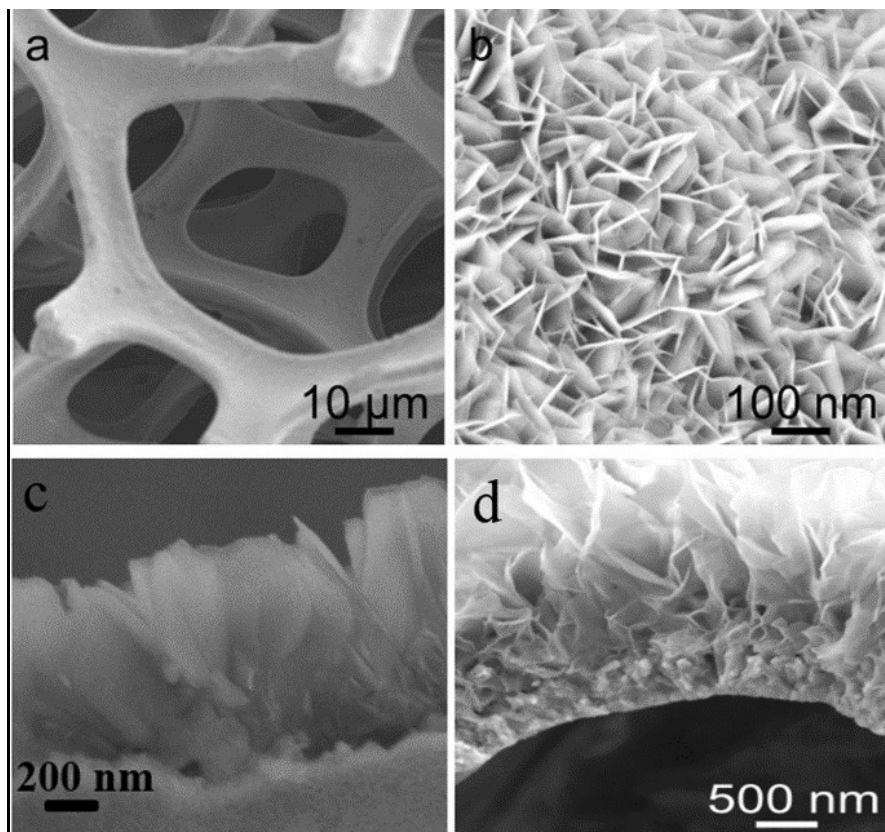

Figure S1. a) The top view, b) high-resolution, c) side view SEM images of a representative  $\text{Ni}_3\text{S}_2$  nanosheet, respectively. (d) A side view SEM image of  $\text{V}_2\text{O}_5@$   $\text{Ni}_3\text{S}_2$ .

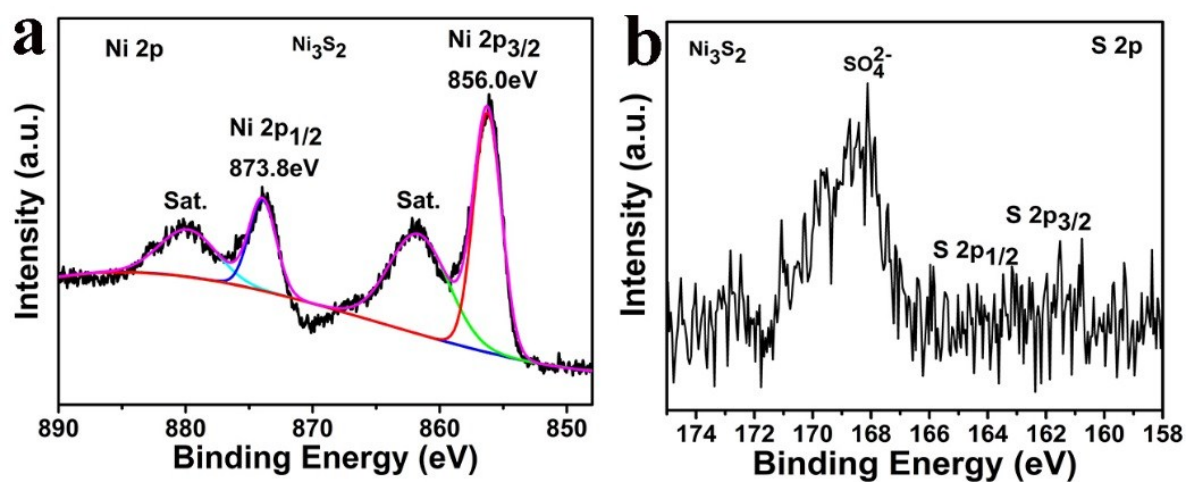

Figure S2. a) Ni 2p and b) S 2p XPS spectral peaks for  $\text{Ni}_3\text{S}_2$  nanosheet.

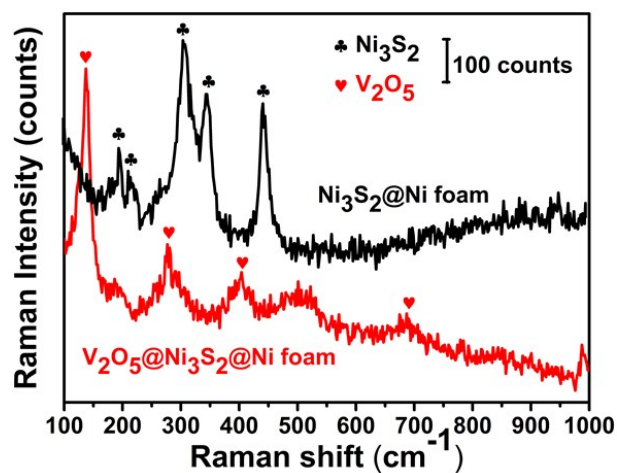

Figure S3. The Raman spectrum of  $\text{Ni}_3\text{S}_2$  (black) and  $\text{V}_2\text{O}_5@\text{Ni}_3\text{S}_2$  (blue) nanosheets.

From Figure S3, the Raman intensity of  $\text{Ni}_3\text{S}_2$  in the  $\text{V}_2\text{O}_5@\text{Ni}_3\text{S}_2$  sample is very low, and only strong  $\text{V}_2\text{O}_5$  can be detected. These results suggest the  $\text{V}_2\text{O}_5$  nanosheet completely cover  $\text{Ni}_3\text{S}_2$  nanosheet.

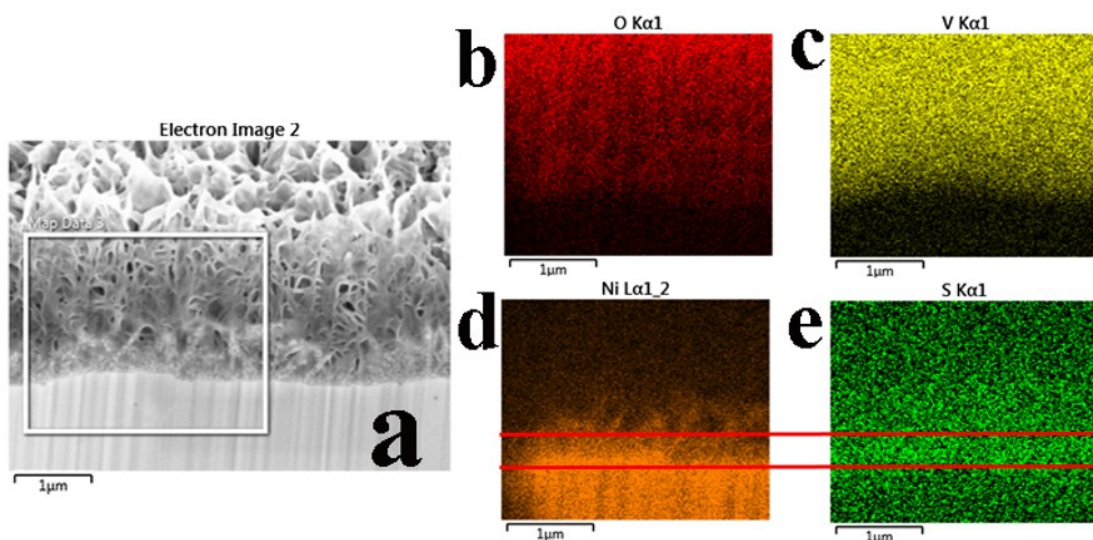

Figure S4. a) The SEM image showing the cross-section of  $\text{V}_2\text{O}_5@\text{Ni}_3\text{S}_2$ , using the FIB technique. The energy dispersive spectroscopy mapping of b) O, c) V, d) Ni and e) S,

and the region corresponding to a).

Figure S4 reveals that  $\text{V}_2\text{O}_5$  is on the top,  $\text{Ni}_3\text{S}_2$  in the middle and Ni foam at the bottom. The thicknesses of  $\text{V}_2\text{O}_5$  and  $\text{Ni}_3\text{S}_2$  layer are approximate  $2\ \mu\text{m}$  and  $0.4\ \mu\text{m}$ , respectively. The element dispersive mappings of Ni and S overlaps at the middle region, indicating this layer is  $\text{Ni}_3\text{S}_2$ .

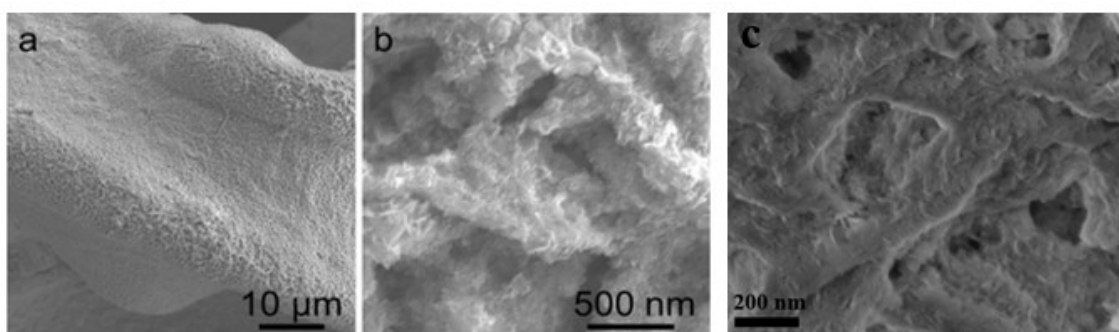

Figure S5. a) A top-view, b) a high-resolution SEM images of  $\text{V}_2\text{O}_5@ \text{Ni}_3\text{S}_2$  after 1000 galvanostatic charge/discharge (GCD) cycles. c) The SEM image of  $\text{Ni}_3\text{S}_2$  after 1000 GCD cycles.

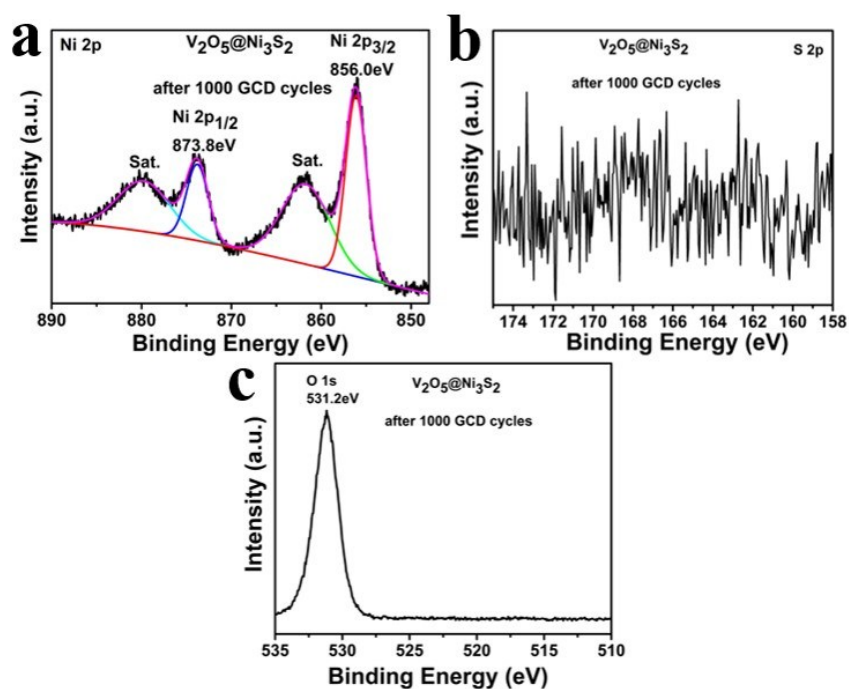

Figure S6. The a) Ni 2p, b) S 2p and c) O 1s XPS spectra of  $V_2O_5@Ni_3S_2$  after 1000 GCD cycles.

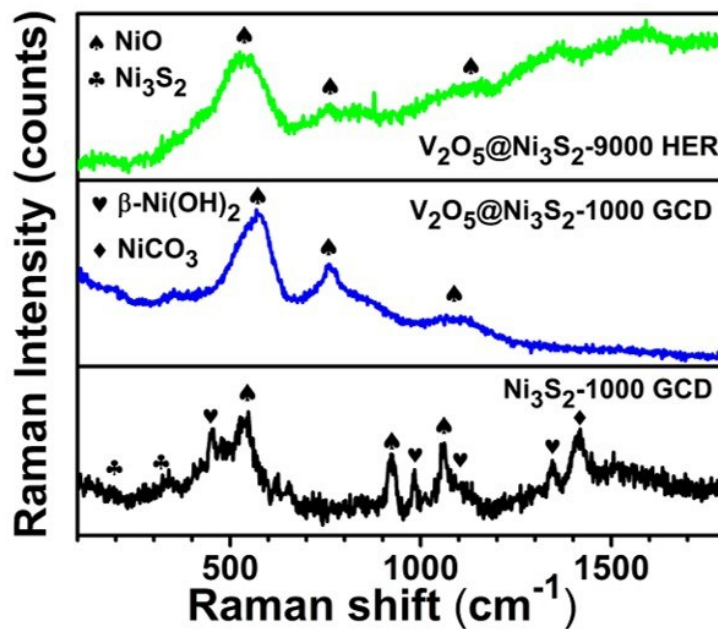

Figure S7. Raman spectra of  $Ni_3S_2$  after 1000 GCD cycles, and  $V_2O_5@Ni_3S_2$  after 1000 GCD cycles and 9000 linear sweep voltammetry (LSV) cycles, respectively.

The Raman spectroscopic investigation was conducted to identify the surface

chemical composition of  $\text{Ni}_3\text{S}_2$  and  $\text{V}_2\text{O}_5@\text{Ni}_3\text{S}_2$  after GCD and HER cycles, respectively. For  $\text{Ni}_3\text{S}_2$  after 1000 GCD cycles, the peak at  $545\text{ cm}^{-1}$  was attributed to one-phonon longitudinal optical (LO), the peak at  $923\text{ cm}^{-1}$  could be assigned to one-phonon transverse optical and one-phonon longitudinal optical mode (TO+LO), and the peak at  $1060\text{ cm}^{-1}$  was attributed to two-phonon longitudinal optical mode (2LO) mode. In addition, there are four peaks at  $453\text{ cm}^{-1}$ ,  $983\text{ cm}^{-1}$ ,  $1103\text{ cm}^{-1}$  and  $1347\text{ cm}^{-1}$  related to the  $\beta\text{-Ni(OH)}_2$  <sup>3-5</sup>, two peaks at  $196\text{ cm}^{-1}$  and  $320\text{ cm}^{-1}$  related to the  $\text{Ni}_3\text{S}_2$  <sup>6</sup> and one peak at  $1416\text{ cm}^{-1}$  corresponded to  $\text{NiCO}_3$  <sup>7</sup>. It reveals that the  $\text{V}_2\text{O}_5$  grown on  $\text{Ni}_3\text{S}_2$  which can be efficiently impeded  $\text{Ni}_3\text{S}_2$  corrosion and produced to  $\beta\text{-Ni(OH)}_2$  and the  $\beta\text{-Ni(OH)}_2$  maybe reacted with carbon oxide from air to form  $\text{NiCO}_3$ .

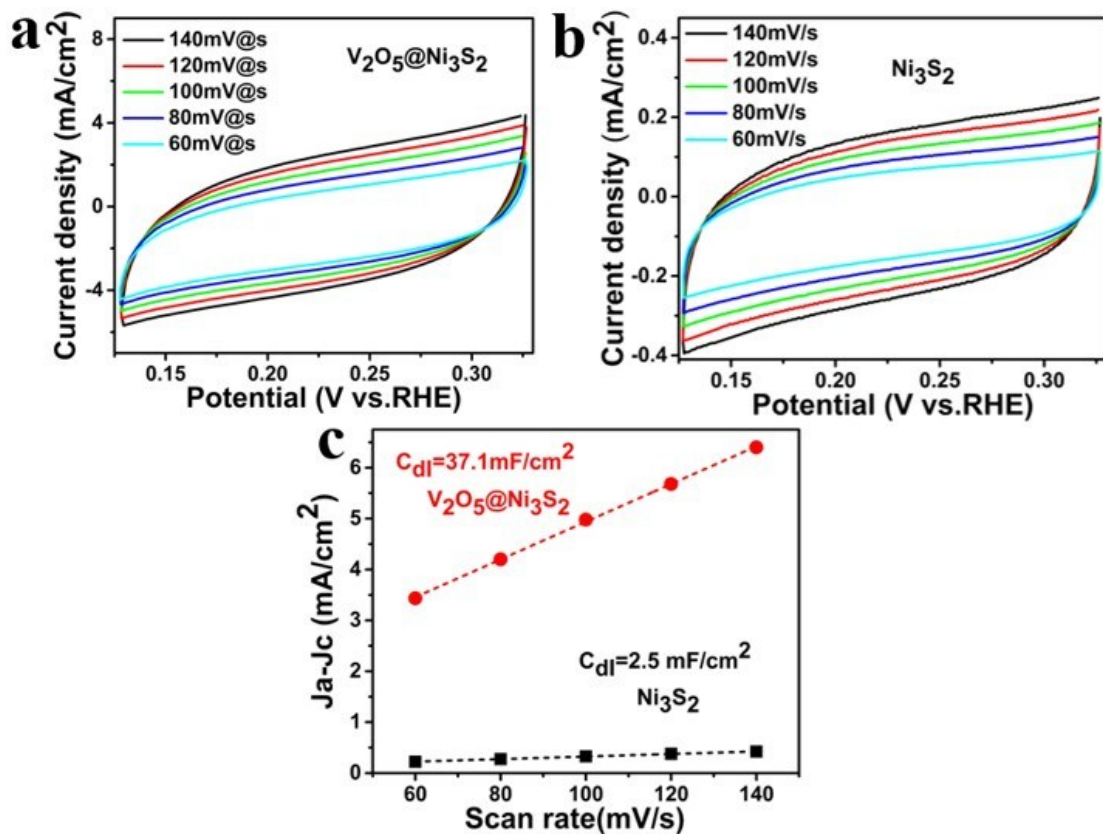

Figure S8. a), b) Cyclic voltammograms (CVs) at different scan rate in the region of 0.13V~0.32 V (vs. RHE) for  $V_2O_5@Ni_3S_2$  and  $Ni_3S_2$ , respectively. c) The variation of double-layer charging currents of  $V_2O_5@Ni_3S_2$  and  $Ni_3S_2$  at 0.225 V (vs. RHE) under various scan rates, respectively.



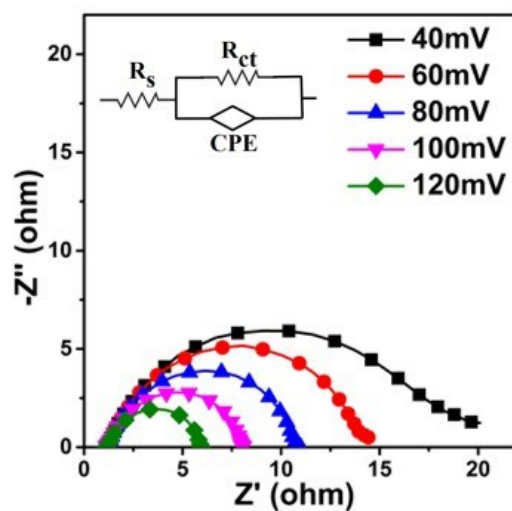

Figure S9. Nyquist plots of  $\text{V}_2\text{O}_5@\text{Ni}_3\text{S}_2$  at various HER overpotentials.

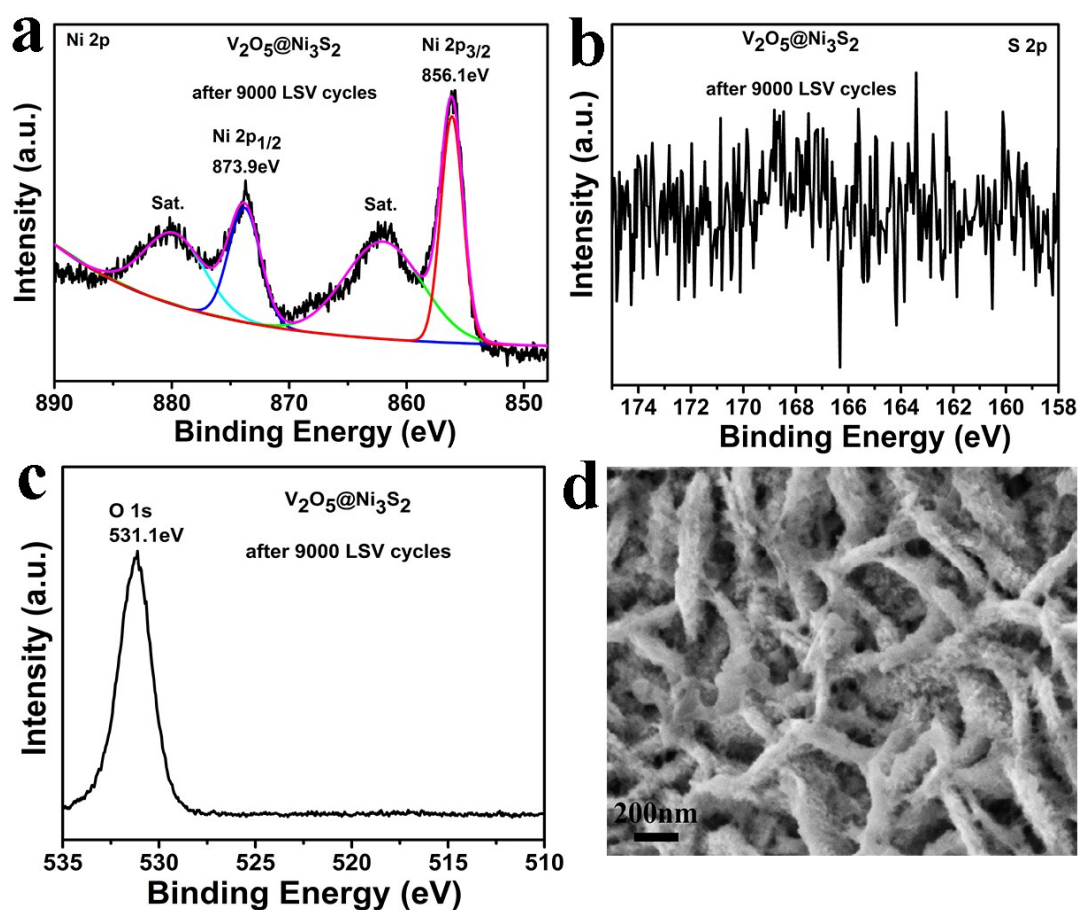

Figure S10. The XPS spectra of Ni 2p a), S 2p b) and O 1s c). d) High-resolution SEM image of  $\text{V}_2\text{O}_5@\text{Ni}_3\text{S}_2$  after 9000 LSV cycles.



## References

1. C. Liu, C. Li, K. Ahmed, Z. Mutlu, C. S. Ozkan and M. Ozkan, *Scientific reports*, 2016, **6**, 29183-29190.
2. S. Wu, K. Hui, K. Hui and K. H. Kim, *Journal of Materials Chemistry A*, 2016, **4**, 9113-9123.
3. H. Li, M. Yu, F. Wang, P. Liu, Y. Liang, J. Xiao, C. Wang, Y. Tong and G. Yang, *Nature communications*, 2013, **4**, 1894-1900.
4. B. Li, M. Ai and Z. Xu, *Chemical Communications*, 2010, **46**, 6267-6269.
5. W. Zhou, X. Cao, Z. Zeng, W. Shi, Y. Zhu, Q. Yan, H. Liu, J. Wang and H. Zhang, *Energy & Environmental Science*, 2013, **6**, 2216-2221.
6. J. Zhang, T. Wang, D. Pohl, B. Rellinghaus, R. Dong, S. Liu, X. Zhuang and X. Feng, *Angew Chem Int Ed Engl*, 2016, **55**, 6702-6707.
7. R. L. Frost, M. L. Weier, W. N. Martens and S. J. Mills, *Neues Jahrbuch für Mineralogie-Abhandlungen: Journal of Mineralogy and Geochemistry*, 2006, **183**, 107-116.
